# Supplementary material for: Transcriptional Regulation of Tetrapyrrole Biosynthesis in Arabidopsis thaliana
Source: Front Plant Sci. 2016 Dec 1;7:1811. doi: 10.3389/fpls.2016.01811 (PMC5130987; doi:10.3389/fpls.2016.01811)
Supplement: Supplementary file 1 [file Table_1.XLSX]

## Sheet: Supplemantal Table 1
Table S1. Arabidopsis genes involved in tetrapyrrole biosynthesis
Pathway	Enzyme name	Gene name	Locus code	cluster No.	Regulator2)
Common Pathway	Glutamyl-tRNA reductase	HEMA1	At1g58290	1	F,G
		HEMA2	At1g09940	3
		HEMA3	At2g31250	3
	Glutamate-1-semialdehyde aminotransferase	GSA1	At5g63570	2
		GSA2	At3g48730	2
	5-aminolevulinic acid dehydratase	ALAD1	At1g69740	2	F
		ALAD2	At1g44318	2
	Porphobilinogen diaminase	PBGD	At5g08280	2
	Uroporphyrinogen III synthase	UROS	At2g26540	3
	Uroporphyrinogen III decarboxylase	URO1	At2g40490	2
		URO2	At3g14930	2	H
	Coproporphyrinogen III oxidase	CPO1	At1g03475	3
		CPO2	At4g03205	3
		CPO3	At5g63290	2
	Protoporphyrinogen IX oxidase	PPO1	At4g01690	2	H
		PPO2	At5g14220	3
Chlophyll Branch	Mg-chelatase ChlI	CHLI1	At4g18480	2
		CHLI2	At5g45930	2
	Mg-chelatase ChlH	CHLH	At5g13630	1	G,H,P,T
	Mg-chelatase ChlD	CHLD	At1g08520	2
	GUN4	GUN4	At3g59400	11)	G,H
	SAM Mg-protoporphyrin IX methyltransferase	CHLM	At4g25080	3	G
	Mg-protoporphyrin IX monomethylester cyclase	CHL27	At3g56940	1	G,H
		LCAA	At5g58250	21)
	Divinyl protochlorophyllide reductase	DVR	At5g18660	21)	H
	Protochlorophyllide oxidoreductase	PORA	At5g54190	4	E,G,R
		PORB	At4g27440	4	E,G
		PORC	At1g03630	2	G,H,P,S
	Chlorophyll synthetase	CHLG	At3g51820	2
	Chlorophyll a oxygenase	CAO	At1g44446	1	G,H,P
	geranylgeranyl reductase	CHLP	At1g74470	11)	H
Heme Branch	Ferrochelatase	FC1	At5g26030	3
		FC2	At2g30390	2
	Heme oxygenase	HO1	At2g26670	3	H
		HO2	At2g26550	2
		HO3	At1g69720	3
		HO4	At1g58300	3
	Phytochromobilin synthase	HY2	At3g09150	3
1)Gene cluster was deduced based on coexpression data (Figure 3). 2)Direct regulators of tetrapyrrole biosynthesis genes; E, EIN3 (Zhong et al., 2009); F, FHY3 (Ouyang et al., 2011; Tang et al., 2012); G, GLKs (Waters et al., 2009); H, HY5 (Lee et al., 2007); P, PIFs (Cheminant et al., 2011; Liu et al., 2013; Toledo-Ortiz et al., 2014); R, RVE1 (Xu et al., 2015); S, SCLs (Ma et al., 2014); T, TOC…

## Sheet: Supplemental Table 2
Table S2. List of genes coexpressed with FLU in Arabidopsis thaliana
Rank	Locus	Alias	Function
query	At3g14110	FLU	Tetratricopeptide repeat (TPR)-like superfamily protein
1	At4g24770	RBP31	31-kDa RNA binding protein
2	At1g48350	EMB3105	Ribosomal L18p/L5e family protein
3	At3g08740	EF-P	elongation factor P (EF-P) family protein
4	At5g17710	EMB1241	Co-chaperone GrpE family protein
5	At5g08540
6	At5g14910	Heavy metal transport/detoxification	Heavy metal transport/detoxification superfamily protein
7	At2g46090	LCBK2	Diacylglycerol kinase family protein
8	At4g01310	L5P	Ribosomal L5P family protein
9	At1g78630	emb1473	Ribosomal protein L13 family protein
10	At4g17560	L19	Ribosomal protein L19 family protein
11	At1g35680	RPL21C	Ribosomal protein L21
12	At5g65220	Ribosomal L29	Ribosomal L29 family protein
13	At2g43030	Ribosomal L3	Ribosomal protein L3 family protein
14	At1g07320	RPL4	ribosomal protein L4
15	At3g60210	GroES-like	GroES-like family protein
16	At4g39040	CRM	RNA-binding CRS1 / YhbY (CRM) domain protein
17	At5g22340
18	At2g47940	EMB3117	DEGP protease 2
19	At1g76405
20	At1g02280	TOC33	translocon at the outer envelope membrane of chloroplasts 33
21	At4g13720	pyrophosphatase	Inosine triphosphate pyrophosphatase family protein
22	At1g74970	TWN3	ribosomal protein S9
23	At5g14320	EMB3137	Ribosomal protein S13/S18 family
24	At2g33800	EMB3113	Ribosomal protein S5 family protein
25	At5g47190	L19	Ribosomal protein L19 family protein
26	At3g32930
27	At3g20230	L18p/L5e	Ribosomal L18p/L5e family protein
28	At1g12410	NCLPP2	CLP protease proteolytic subunit 2
29	At1g05190	emb2394	Ribosomal protein L6 family
30	At1g60230	SAM	Radical SAM superfamily protein
31	At2g33450	PRPL28	Ribosomal L28 family
32	At3g25920	RPL15	ribosomal protein L15
33	At4g24750	phosphatase	Rhodanese/Cell cycle control phosphatase superfamily protein
34	At2g38140	PSRP4	plastid-specific ribosomal protein 4
35	At2g40760	phosphatase	Rhodanese/Cell cycle control phosphatase superfamily protein
36	At3g49470	NACA2	nascent polypeptide-associated complex subunit alpha-like protein 2
37	At2g33430	MORF2	differentiation and greening-like 1
38	At1g33290	hydrolase	P-loop containing nucleoside triphosphate hydrolases superfamily protein
39	At1g17650	GR2	glyoxylate reductase 2
40	At5g06340	NUDX27	nudix hydrolase homolog 27
41	At3g13120	S10p/S20e	Ribosomal protein S10p/S20e family protein
42	At1g29070	L34	Ribosomal protein L34
43	At4g38490
44	At3g58140	IIc	phenylalanyl-tRNA synthetase class IIc family protein
45	At4g38160	pde191	Mitochondrial transcription termination factor family protein
46	At1g53120	RNA-binding S4	RNA-binding S4 domain-containing protein
47	At1g32990	PRPL11	plastid ribosomal protein l11
48	At5g63310	NDPK2	nucleoside diphosphate kinase 2
49	At3g15190	PRPS20	chloroplast 30S ribosomal protein S20, putative
50	At3g54210	L17	Ribosomal protein L17 family protein
51	At3g44890	RPL9	ribosomal protein L9
52	At5g45040	CYTC6A	Cytochrome c
53	At5g54600	RPL24	Translation protein SH3-like family protein
54	At5g19370	PPIASE	rhodanese-like domain-containing protein / PPIC-type PPIASE domain-containing protein
55	At4g39460	SAMT1	S-adenosylmethionine carrier 1
56	At4g36390	transferase	Methylthiotransferase
57	At3g12080	emb2738	GTP-binding family protein
58	At2g44640
59	At1g02150	Tetratricopeptide repeat (TPR)-like	Tetratricopeptide repeat (TPR)-like superfamily protein
60	At5g52960
61	At5g11480	hydrolase	P-loop containing nucleoside triphosphate hydrolases superfamily protein
62	At3g29185	DUF3598	Domain of unknown function (DUF3598)
63	At1g64510	ribosome	Translation elongation factor EF1B/ribosomal protein S6 family protein
64	At5g15390	SpoU	tRNA/rRNA methyltransferase (SpoU) family protein
65	At3g56910	PSRP5	plastid-specific 50S ribosomal protein 5
66	At3g52150	PSRP2	RNA-binding (RRM/RBD/RNP motifs) family protein
67	At2g35500	SKL2	shikimate kinase like 2
68	At5g65250
69	At1g11430	MORF9	plastid developmental protein DAG, putative
70	At3g60370	isomerase	FKBP-like peptidyl-prolyl cis-trans isomerase family protein
71	At1g79850	RPS17	ribosomal protein S17
72	At3g63190	RRF	ribosome recycling factor, chloroplast precursor
73	At4g30620	COG0718	Uncharacterised BCR, YbaB family COG0718
74	At2g44650	CPN10	chloroplast chaperonin 10
75	At3g19810	DUF177	Protein of unknown function (DUF177)
76	At5g27400	transferase	S-adenosyl-L-methionine-dependent methyltransferases superfamily protein
77	At5g30510	RPS1	ribosomal protein S1
78	At1g11750	NCLPP6	CLP protease proteolytic subunit 6
79	At2g36250	FTSZ2-1	Tubulin/FtsZ family protein
80	At2g24020	COG0718	Uncharacterised BCR, YbaB family COG0718
81	At3g63170	FAP1	Chalcone-flavanone isomerase family protein
82	At5g11450	PPD5	Mog1/PsbP/DUF1795-like photosystem II reaction center PsbP family protein
83	At1g01080	RNA-binding	RNA-binding (RRM/RBD/RNP motifs) family protein
84	At5g17870	PSRP6	plastid-specific 50S ribosomal protein 6
85	At3g06950	synthase	Pseudouridine synthase family protein
86	At3g59980	OB-fold-like	Nucleic acid-binding, OB-fold-like protein
87	At5g51100	FSD2	Fe superoxide dismutase 2
88	At5g53860	EMB64	embryo defective 2737
89	At3g63490	PRPL1	Ribosomal protein L1p/L10e family
90	At3g18680	kinase	Amino acid kinase family protein
91	At3g24570	Mpv17/PMP22	Peroxisomal membrane 22 kDa (Mpv17/PMP22) family protein
92	At1g22700	Tetratricopeptide repeat (TPR)-like	Tetratricopeptide repeat (TPR)-like superfamily protein
93	At5g58250	EMB3143
94	At4g28706	kinase	pfkB-like carbohydrate kinase family protein
95	At3g27160	GHS1	Ribosomal protein S21 family protein
96	At4g30580	LPAT1	Phospholipid/glycerol acyltransferase family protein
97	At5g03940	SRP54CP	chloroplast signal recognition particle 54 kDa subunit
98	At3g09210	PTAC13	plastid transcriptionally active 13
99	At2g37220	RNA-binding	RNA-binding (RRM/RBD/RNP motifs) family protein
100	At4g28210	EMB1923	embryo defective 1923
Data are from the ATTED-II coexpression database (ver. 8.0, http://atted.jp/) at 23th September, 2016. The top coexpressed 100 genes are shown.

## Sheet: Supplemental Table 3
Table S3. List of genes coexpressed with GBP in Arabidopsis thaliana
Rank	Locus	Alias	Function
query	At3g21200	GBP/PGR7	GluTR binding protein/proton gradient regulation 7
1	At5g08280	PBGD/HEMC	porphobilinogen deaminase/hydroxymethylbilane synthase
2	At3g52380	PDE322	chloroplast RNA-binding protein 33
3	At3g25660	Amidase	Amidase family protein
4	At2g38270	CXIP2	CAX-interacting protein 2
5	At4g37040	MAP1D	methionine aminopeptidase 1D
6	At5g45930	CHLI2	magnesium chelatase i2
7	At2g37660	Rossmann-fold	NAD(P)-binding Rossmann-fold superfamily protein
8	At5g63570	GSA1	glutamate-1-semialdehyde-2,1-aminomutase
9	At2g40490	URO1/HEME2	Uroporphyrinogen decarboxylase
10	At5g47190	L19	Ribosomal protein L19 family protein
11	At3g48730	GSA2	glutamate-1-semialdehyde 2,1-aminomutase 2
12	At3g49560	Tim17/Tim22/Tim23	Mitochondrial import inner membrane translocase subunit Tim17/Tim22/Tim23 family protein
13	At5g55220	chaperonin	trigger factor type chaperone family protein
14	At2g42130	fibrillin	Plastid-lipid associated protein PAP / fibrillin family protein
15	At3g12930	Lojap	Lojap-related protein
16	At3g52150	PSRP2	RNA-binding (RRM/RBD/RNP motifs) family protein
17	At1g48350	EMB3105	Ribosomal L18p/L5e family protein
18	At1g64510	ribosome	Translation elongation factor EF1B/ribosomal protein S6 family protein
19	At3g25805
20	At2g35500	SKL2	shikimate kinase like 2
21	At3g13120	S10p/S20e	Ribosomal protein S10p/S20e family protein
22	At3g24590	PLSP1	plastidic type i signal peptidase 1
23	At1g62780
24	At5g46580	PPR	pentatricopeptide (PPR) repeat-containing protein
25	At5g13510	EMB3136	Ribosomal protein L10 family protein
26	At4g12060	Double Clp-N motif	Double Clp-N motif protein
27	At4g28660	PSB28	photosystem II reaction center PSB28 protein
28	At1g60600	ABC4	UbiA prenyltransferase family protein
29	At5g58250	EMB3143
30	At3g08740	EF-P	elongation factor P (EF-P) family protein
31	At3g15190	PRPS20	chloroplast 30S ribosomal protein S20, putative
32	At4g01690	PPO1	protoporphyrinogen oxidase
33	At4g17600	LIL3:1	Chlorophyll A-B binding family protein
34	At1g11430	MORF9	plastid developmental protein DAG, putative
35	At3g54210	L17	Ribosomal protein L17 family protein
36	At1g01080	RNA-binding	RNA-binding (RRM/RBD/RNP motifs) family protein
37	At5g38290	hydrolase	Peptidyl-tRNA hydrolase family protein
38	At5g44650	Y3IP1
39	At2g25830	YebC	YebC-related
40	At1g14270	protease	CAAX amino terminal protease family protein
41	At5g05740	EGY2	ethylene-dependent gravitropism-deficient and yellow-green-like 2
42	At1g79850	RPS17	ribosomal protein S17
43	At3g04790	EMB3119	Ribose 5-phosphate isomerase, type A protein
44	At1g32990	PRPL11	plastid ribosomal protein l11
45	At3g18680	kinase	Amino acid kinase family protein
46	At1g56050	GTP-binding	GTP-binding protein-related
47	At5g14320	EMB3137	Ribosomal protein S13/S18 family
48	At5g52520	PRORS1	Class II aaRS and biotin synthetases superfamily protein
49	At3g25480	phosphatase	Rhodanese/Cell cycle control phosphatase superfamily protein
50	At5g14910	Heavy metal transport/detoxification	Heavy metal transport/detoxification superfamily protein
51	At5g66470	RNA binding;GTP binding	RNA binding;GTP binding
52	At4g32915
53	At5g28500
54	At2g33800	EMB3113	Ribosomal protein S5 family protein
55	At5g13120	Pnsl5	cyclophilin 20-2
56	At3g51140	DUF3353	Protein of unknown function (DUF3353)
57	At5g30510	RPS1	ribosomal protein S1
58	At2g44650	CPN10	chloroplast chaperonin 10
59	At1g75350	emb2184	Ribosomal protein L31
60	At1g04420	oxidoreductase	NAD(P)-linked oxidoreductase superfamily protein
61	At3g14930	URO1/HEME1	Uroporphyrinogen decarboxylase
62	At2g42770	Mpv17/PMP22	Peroxisomal membrane 22 kDa (Mpv17/PMP22) family protein
63	At1g63610
64	At4g02530	chloroplast thylakoid lumen	chloroplast thylakoid lumen protein
65	At5g14660	PDF1B	peptide deformylase 1B
66	At1g11750	NCLPP6	CLP protease proteolytic subunit 6
67	At3g51820	PDE325	UbiA prenyltransferase family protein
68	At1g35680	RPL21C	Ribosomal protein L21
69	At5g18660	PCB2	NAD(P)-binding Rossmann-fold superfamily protein
70	At3g53560	Tetratricopeptide repeat (TPR)-like	Tetratricopeptide repeat (TPR)-like superfamily protein
71	At4g17300	OVA8	Class II aminoacyl-tRNA and biotin synthetases superfamily protein
72	At5g51100	FSD2	Fe superoxide dismutase 2
73	At2g24090	PRPL35	Ribosomal protein L35
74	At2g43560	isomerase	FKBP-like peptidyl-prolyl cis-trans isomerase family protein
75	At3g59870
76	At1g08640	CJD1	Chloroplast J-like domain 1
77	At3g09210	PTAC13	plastid transcriptionally active 13
78	At2g47590	PHR2	photolyase/blue-light receptor 2
79	At1g32500	NAP6	non-intrinsic ABC protein 6
80	At4g25370	Double Clp-N motif	Double Clp-N motif protein
81	At1g15140	oxidoreductase	FAD/NAD(P)-binding oxidoreductase
82	At5g52970	thylakoid lumen 15.0 kDa	thylakoid lumen 15.0 kDa protein
83	At3g58140	IIc	phenylalanyl-tRNA synthetase class IIc family protein
84	At3g25920	RPL15	ribosomal protein L15
85	At3g04650	oxidoreductase	FAD/NAD(P)-binding oxidoreductase family protein
86	At3g53130	LUT1	Cytochrome P450 superfamily protein
87	At3g15110
88	At4g24090
89	At2g17033	PPR	pentatricopeptide (PPR) repeat-containing protein
90	At4g25130	PMSR4	peptide met sulfoxide reductase 4
91	At1g12800	OB-fold-like	Nucleic acid-binding, OB-fold-like protein
92	At2g26930	PDE277	4-(cytidine 5'-phospho)-2-C-methyl-D-erithritol kinase
93	At1g66670	NCLPP3	CLP protease proteolytic subunit 3
94	At3g62910	cpRF1	Peptide chain release factor 1
95	At3g20320	TGD2	trigalactosyldiacylglycerol2
96	At4g18480	CHLI1	magnesium chelatase i1
97	At1g36390	GrpE	Co-chaperone GrpE family protein
98	At1g08540	SIGB	RNApolymerase sigma subunit 2
99	At1g74730	DUF1118	Protein of unknown function (DUF1118)
100	At3g06730	TRX z	Thioredoxin z
Data are from the ATTED-II coexpression database (ver. 8.0, http://atted.jp/) at 23th September, 2016. The top coexpressed 100 genes are shown.
